# Supplementary material for: Efficient electromagnetic interference shielding of lightweight carbon nanotube/polyethylene compositesviacompression molding plus salt-leaching
Source: Royal Society of Chemistry journal article supplement (doi:10.1039/c7ra13453c), 2018-01-01
Supplement: c7ra13453c1.pdf [file c7ra13453c1.pdf]

Electronic Supplementary Material (ESI) for RSC advance.

This journal is © The Royal Society of Chemistry 2018

## Supplementary Information

### **Efficient electromagnetic interference shielding of lightweight carbon nanotube/polyethylene composite via compression molding plus salt-leaching**

Ling Xu<sup>a</sup>, Li-Chuan Jia<sup>a</sup>, Ding-Xiang Yan<sup>b,\*</sup>, Peng-Gang Ren<sup>c</sup>, Jia-Zhuang Xu<sup>a</sup>,  
Zhong-Ming Li<sup>a,\*</sup>

<sup>a</sup>College of Polymer Science and Engineering, State Key Laboratory of Polymer Materials Engineering, Sichuan University, Chengdu, 610065, China.

<sup>b</sup>School of Aeronautics and Astronautics, Sichuan University, Chengdu 610065, China

<sup>c</sup>Institute of Printing, Packaging Engineering and Digital Media Technology, Xi'an University of Technology, Xi'an, Shaanxi 710048, China

\* Corresponding authors

E-mail: yandingxiang@scu.edu.cn; zmli@scu.edu.cn

**1. SEM images of the fractured surface of the solid CNT/PE composite**

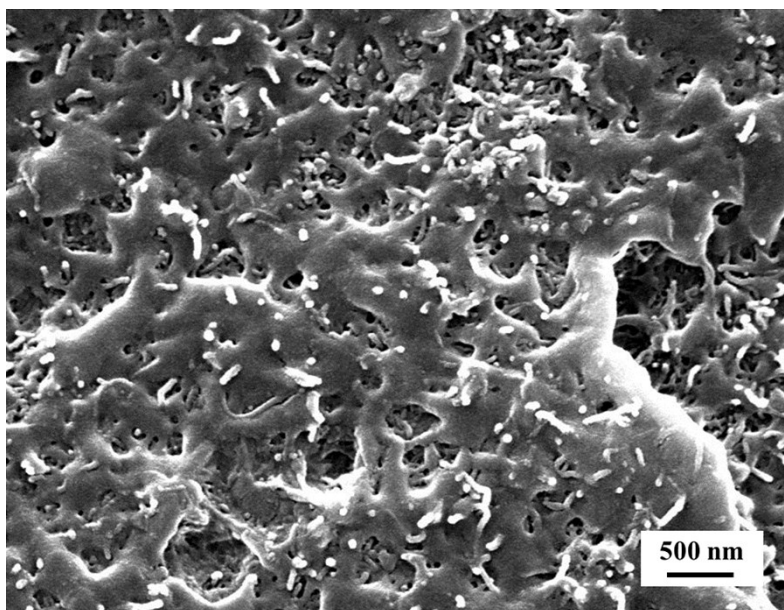

**Fig. S1** SEM images of the fractured surface of the solid CNT/PE composite.

2. Table S1 Average EMI SE in X-band frequency range for the CNT/HDPE foam composite and several other reported foam composites in literature.

| Polymer matrix              | Filler content | Density (g/cm <sup>3</sup> ) | EMI SE (dB) | Ref.         |
|-----------------------------|----------------|------------------------------|-------------|--------------|
| CNT/HDPE                    | 3.39 vol%      | 0.26                         | 27.1        | Present work |
| CNT/PS <sup>a)</sup>        | 7.0 wt%        | 0.56                         | 20          | 1            |
| Graphene/PS <sup>a)</sup>   | 5.6 vol%       | 0.47                         | 29          | 2            |
| Graphene/PS <sup>a)</sup>   | 5.6 vol%       | 0.27                         | 17          | 2            |
| Graphene/PEI <sup>a)</sup>  | 10.0 wt%       | 0.25                         | 11          | 3            |
| Graphene/PMMA <sup>a)</sup> | 5.0 wt%        | 0.79                         | 16          | 4            |
| Graphene/PI <sup>a)</sup>   | 16.0 wt%       | 0.28                         | 20          | 5            |
| CNT/PU <sup>a)</sup>        | 0.35 wt%       | 0.71                         | 28          | 6            |
| CNT/PU <sup>a)</sup>        | 0.35 wt%       | 0.58                         | 8           | 6            |
| CNT/PC <sup>a)</sup>        | 2.0 wt%        | 0.56                         | 11          | 7            |
| CNT/PC <sup>a)</sup>        | 2.0 wt%        | 0.44                         | 7           | 7            |
| CNT/PVDF <sup>a)</sup>      | 10.0 wt%       | 0.8                          | 25          | 8            |

<sup>a)</sup> PS, PEI, PMMA, PI, and PVDF are polystyrene, polyetherimide, poly (methyl methacrylate), polyimide and polyvinylidene fluoride, respectively.

### 3. The skin depth of L-CNT/HDPE, M-CNT/HDPE and S-CNT/HDPE

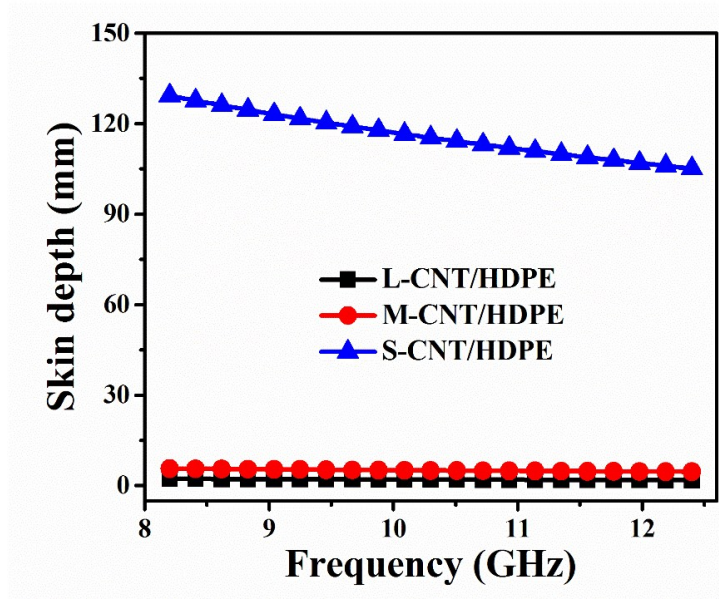

**Fig. S2** Variation in skin depth ( $\delta$ ) of L-CNT/HDPE, M-CNT/HDPE and S-CNT/HDPE as a function of frequency.

The skin depth ( $\delta$ ) of a shielding material can be calculated using the formula  $\delta = 1 / \sqrt{\pi f \sigma \mu}$  (Song W. L., Carbon 2014, 66, 67), where  $f$  is the frequency,  $\sigma$  is electrical conductivity, and  $\mu$  is the magnetic permeability of materials with a relationship of  $\mu = \mu_o \mu_r$  ( $\mu_o = 4\pi \times 10^{-7}$  H/m,  $\mu_r$  is material's relative magnetic permeability and is equal to 1 for the nonmagnetic composite). The final calculated results are plotted in Fig. S2. It is observed that  $\delta$  of S-CNT/HDPE significantly decreases with increased frequency, while  $\delta$  of L-CNT/HDPE and M-CNT/HDPE is almost independent on frequency. For example,  $\delta$  of S-CNT/HDPE is 129.2 and 105.1 mm at 8.2 and 12.4 GHz, respectively, meaning that a higher EMI SE can be achieved in S-CNT/HDPE at the high frequency.

## References

1. Y. Yang, M. C. Gupta, K. L. Dudley and R. W. Lawrence, *Nano Letters*, 2005, **5**, 2131-2134.
2. D.-X. Yan, P.-G. Ren, H. Pang, Q. Fu, M.-B. Yang and Z.-M. Li, *Journal of Materials Chemistry*, 2012, **22**, 18772-18774.
3. J. Ling, W. Zhai, W. Feng, B. Shen, J. Zhang and W. g. Zheng, *ACS Applied Materials & Interfaces*, 2013, **5**, 2677-2684.
4. H.-B. Zhang, Q. Yan, W. G. Zheng, Z. He and Z. Z. Yu, *ACS Applied Materials & Interfaces*, 2011, **3**, 918-924.
5. Y. Li, X. Pei, B. Shen, W. Zhai, L. Zhang and W. Zheng, *RSC Advances*, 2015, **5**, 24342-24351.
6. M. M. Bernal, M. Martin-Gallego, I. Molenberg, I. Huynen, M. A. L. Manchado and R. Verdejo, *RSC Advances*, 2014, **4**, 7911-7918.
7. L. Monnereau, L. Urbanczyk, J.-M. Thomassin, T. Pardoën, C. Bailly, I. Huynen, C. Jérôme and C. Detrembleur, *Polymer*, 2015, **59**, 117-123.
8. H. Wang, K. Zheng, X. Zhang, X. Ding, Z. Zhang, C. Bao, L. Guo, L. Chen and X. Tian, *Composites Science and Technology*, 2016, **125**, 22-29.
